# Supplementary material for: VirS, an OmpR/PhoB subfamily response regulator, is required for activation of vapA gene expression in Rhodococcus equi
Source: PubMed Central journal article supplement (PMC4190465; doi:10.1186/s12866-014-0243-1), 2014-10-03
Supplement: 12866_2014_243_MOESM2_ESM.pdf [file 12866_2014_243_MOESM2_ESM.pdf]

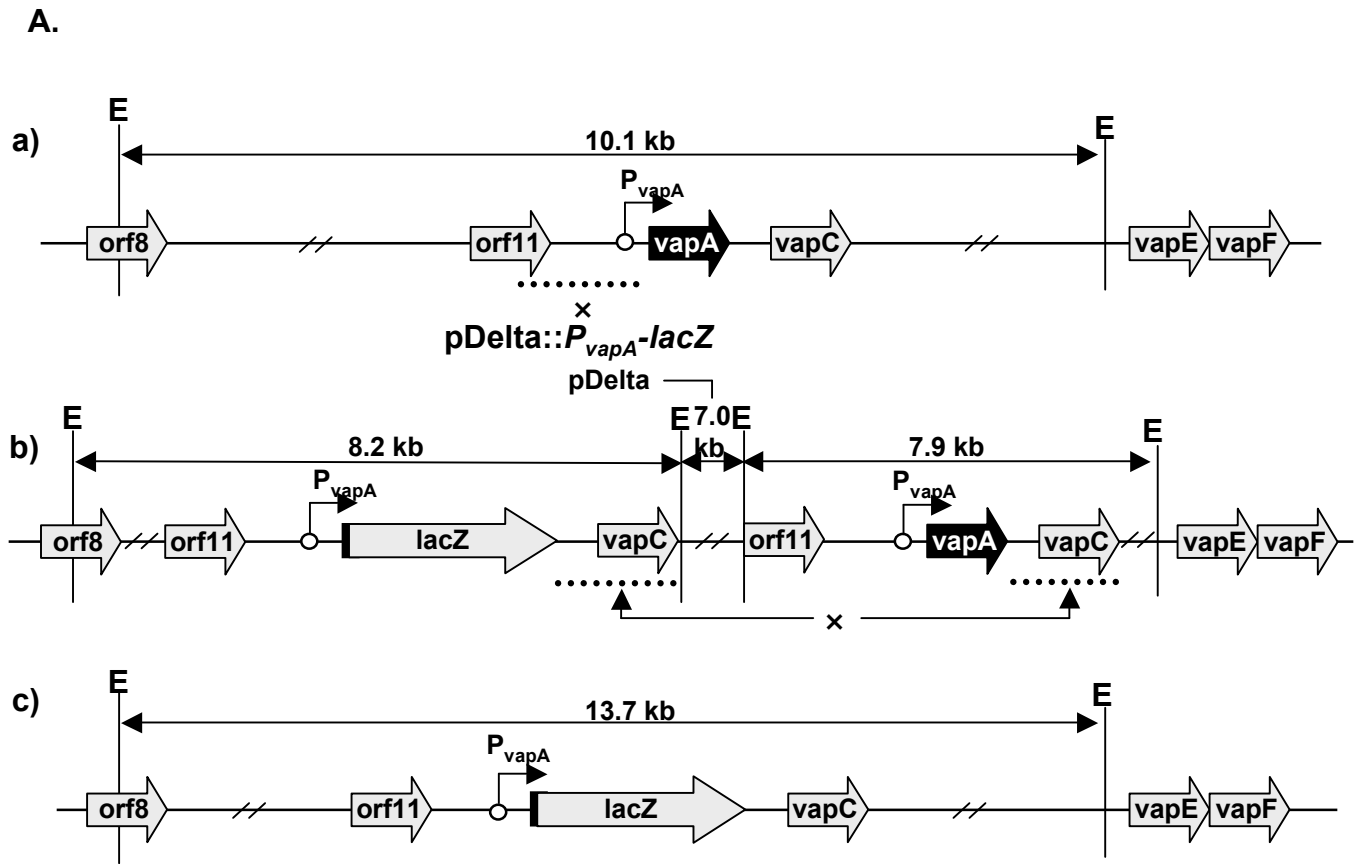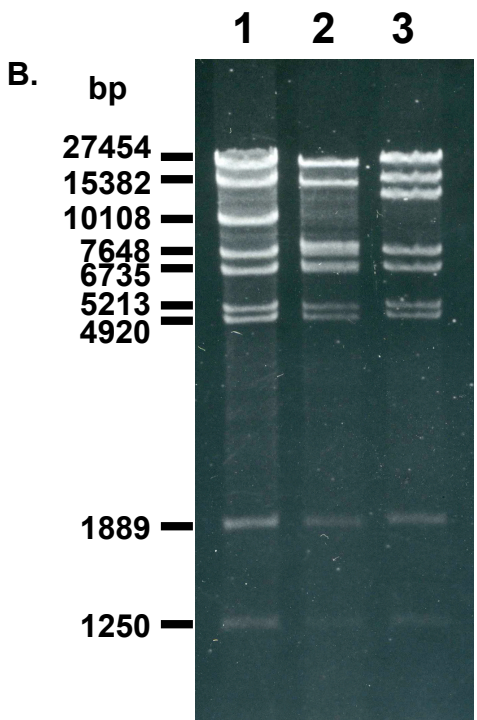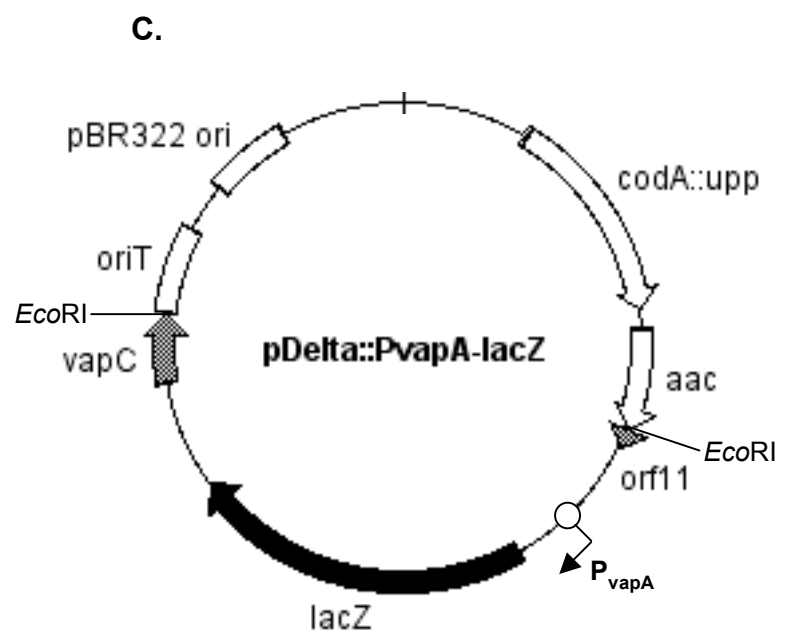

Fig.S1
